# Supplementary material for: Chemically recyclable and reprogrammable epoxy thermosets derived from renewable resources
Source: Royal Society of Chemistry journal article supplement (doi:10.1039/d4su00382a), 2024-01-01
Supplement: d4su00382a1.pdf [file d4su00382a1.pdf]

## Supporting Information

### Chemically Recyclable and Reprogrammable Epoxy Thermosets Derived from Renewable Resources

Tankut Türel,<sup>at</sup> Özgün Dağlar,<sup>at</sup> Christos Pantazidis,<sup>a</sup> and Željko Tomović<sup>a\*</sup>

a) Polymer Performance Materials Group, Department of Chemical Engineering and Chemistry, Eindhoven University of Technology, 5600 MB Eindhoven, The Netherlands.

### Contents

|                                                                                                                   |     |
|-------------------------------------------------------------------------------------------------------------------|-----|
| 1) Synthesis and Characterization of 2-((2-(Vinylloxy)ethoxy)methyl)oxirane (VE2), C2 and the model compound..... | S2  |
| 2) Solvent and Water Resistivity of C2PDA and C2FDA Networks.....                                                 | S6  |
| 3) Dynamic Mechanical Analysis of the Original Networks .....                                                     | S9  |
| 4) Mechanical Characterization of the Original Networks and Composite .....                                       | S10 |
| 5) Interface Characterization of the Composite through Scanning Electron Microscopy .....                         | S11 |
| 6) Structural Characterization of the Acid Depolymerization Products.....                                         | S12 |
| 7) Recycling of Carbon Fibers from the C2FDA-CFC .....                                                            | S18 |
| 8) Thermal Characterization of Recycled Networks .....                                                            | S19 |
| 9) Thermomechanical and Mechanical Characterization of Recycled Networks .....                                    | S20 |
| 10) Thermomechanical and Mechanical Characterization of Reprogrammed C2PDAFDA Network .....                       | S20 |
| 11) Extended Data .....                                                                                           | S21 |

# 1) Synthesis and Characterization of 2-((2-(Vinylloxy)ethoxy)methyl)oxirane (VE2), C2 and the model compound

## Synthesis of VE2

Ethylene glycol vinyl ether (39.0 g, 0.44 mol) and tetrabutyl ammonium bromide (TBAB, 4.7 g, 15 mmol) were dissolved in 260 mL of the toluene/NaOH (50wt %) mixture (1:1 by volume) in a 1 L three-necked round-bottom flask equipped with a reflux condenser, an Ar inlet, and a dropping funnel, and the mixture was cooled to 0 °C. Epichlorohydrin (65.81 g, 0.71 mol) was added dropwise over 1 h. After completion of the addition, the reaction temperature was raised to room temperature and the mixture was allowed to stir for 24 h at this temperature under Ar flow. The reaction mixture was extracted with distilled water and dried over magnesium sulfate. Upon removal of the solvent, the crude product was purified upon distillation under reduced pressure to give a colorless liquid with a yield of 57.2 g, 90.1%. <sup>1</sup>H NMR (399 MHz, Chloroform-*d*) δ 6.50 (dd, *J* = 14.3, 6.8 Hz, 1H), 4.19 (dd, *J* = 14.3, 2.2 Hz, 1H), 4.02 (dd, *J* = 6.8, 2.2 Hz, 1H), 3.90 – 3.77 (m, 4H), 3.44 (dd, *J* = 11.7, 5.9 Hz, 1H), 3.17 (ddt, *J* = 5.8, 4.2, 2.8 Hz, 1H), 2.80 (dd, *J* = 5.0, 4.1 Hz, 1H), 2.62 (dd, *J* = 5.0, 2.7 Hz, 1H). <sup>13</sup>C NMR (100 MHz, CDCl<sub>3</sub>) δ 151.84, 86.89, 72.17, 69.86, 67.35, 50.94, 44.33.

## Synthesis of C2

Vanillin (4.93 g, 32.4 mmol) and **VE2** (7.01 g, 48.6 mmol) were mixed in a 100 mL three-necked round-bottom flask equipped with a reflux condenser and an Ar inlet. The mixture was heated to 95 °C for 24 hours under Ar flow. After cooling to room temperature, the crude product was purified using column chromatography with ethyl acetate and cyclohexane as eluents. The **C2** monomer was obtained as a yellow liquid with a yield of 5.05 g, 52.6%.

Scheme S1. Synthetic pathway towards **VE2** and **C2**.

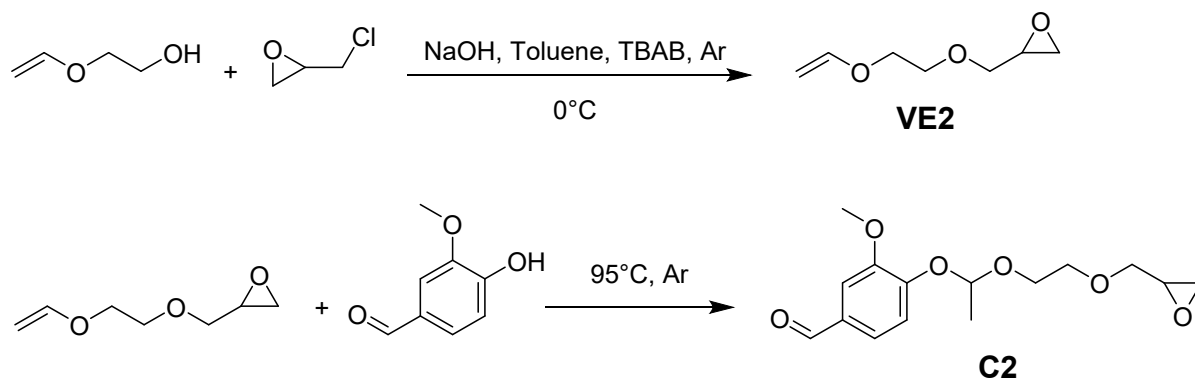

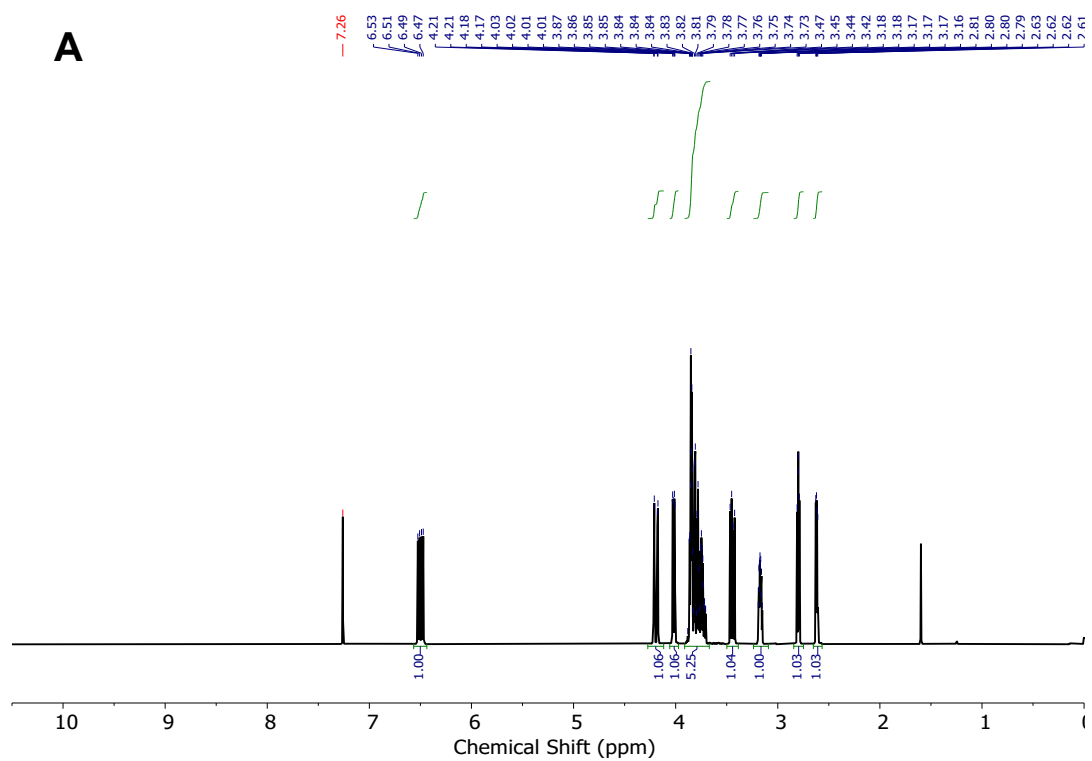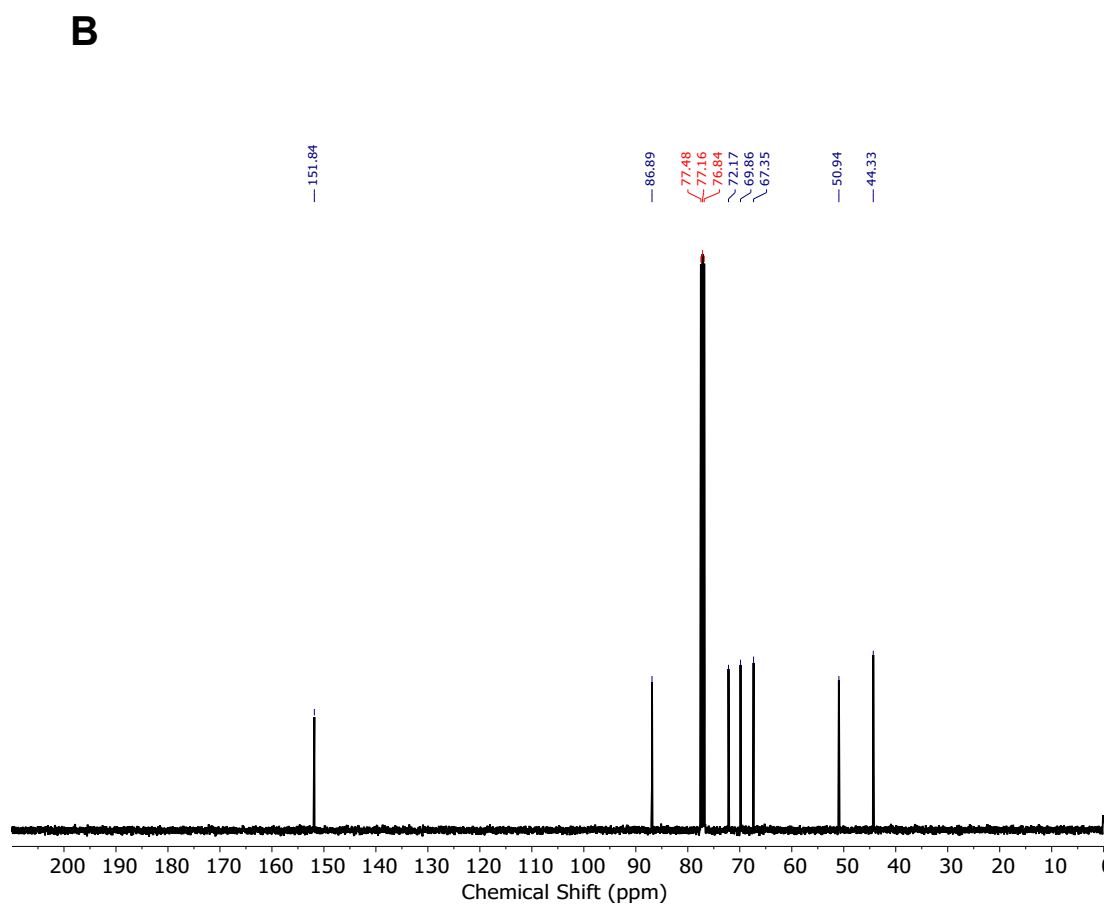

Figure S1.  $^1\text{H}$  NMR (A) and  $^{13}\text{C}$  NMR (B) spectra of 2-((2-(Vinyloxy)ethoxy)methyl)oxirane (**VE2**) recorded in  $\text{CDCl}_3$ .

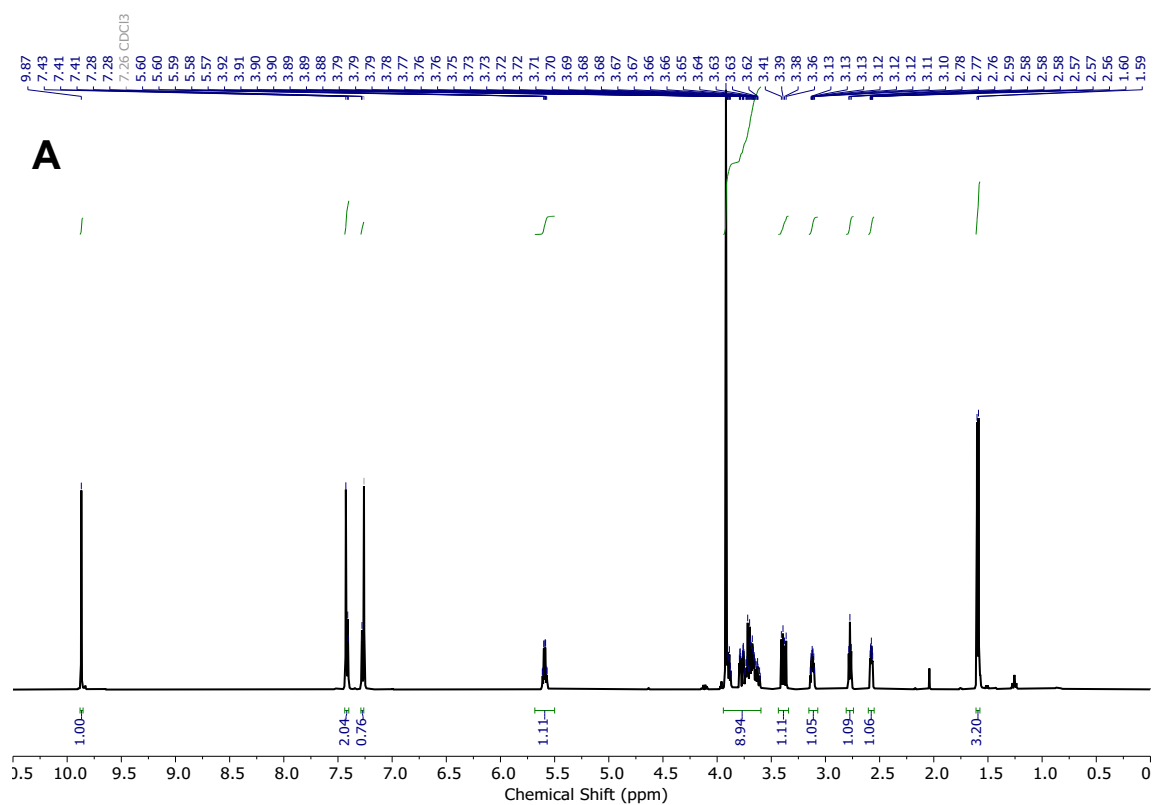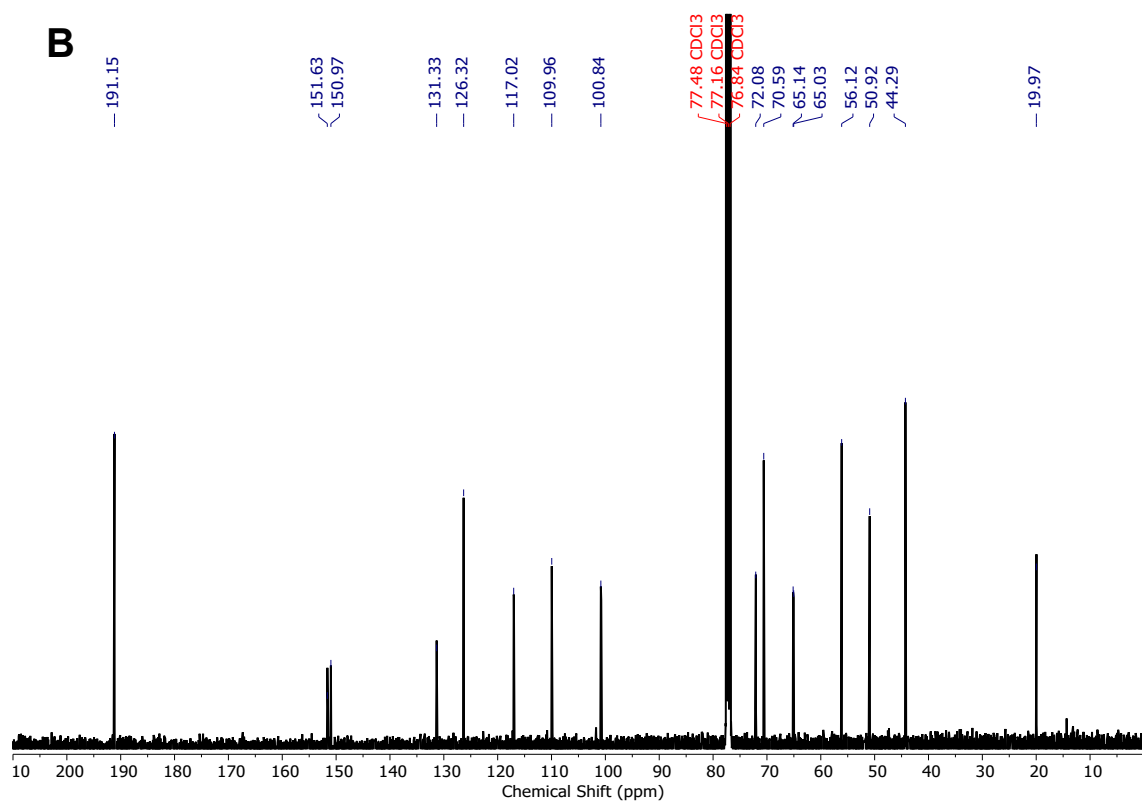

Figure S2.  $^1\text{H}$  NMR (A) and  $^{13}\text{C}$  NMR (B) spectra of **C2** recorded in  $\text{CDCl}_3$ .

## Synthesis of model compound

805 mg of **C2** was mixed with 400 mg of furfuryl amine at room temperature. The mixture was then heated to 100°C. For a duration of 2 hours, <sup>1</sup>H NMR measurements were taken at 30-minute intervals.

Scheme S2. Model reaction.

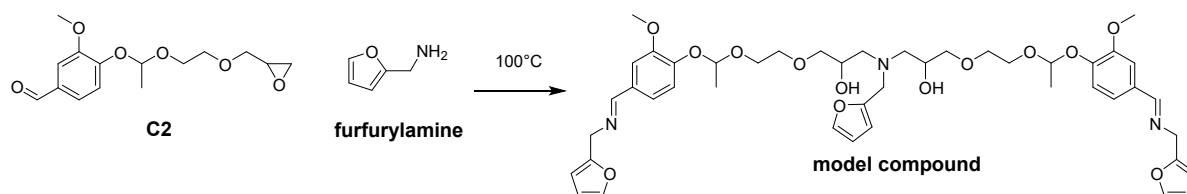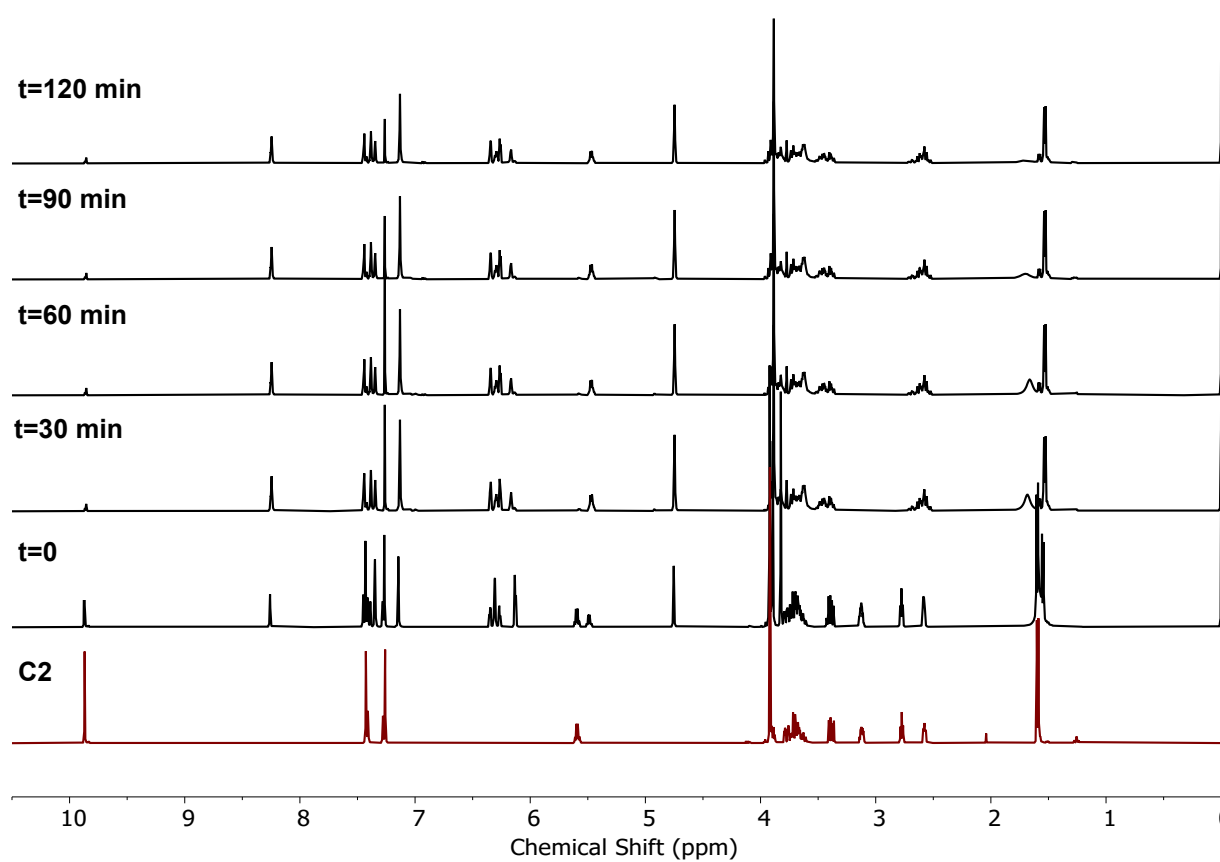

Figure S3. Time-dependent <sup>1</sup>H NMR spectra of the reaction between **C2** monomer and furfuryl amine recorded in CDCl<sub>3</sub>.

## 2) Solvent and Water Resistivity of C2PDA and C2FDA Networks

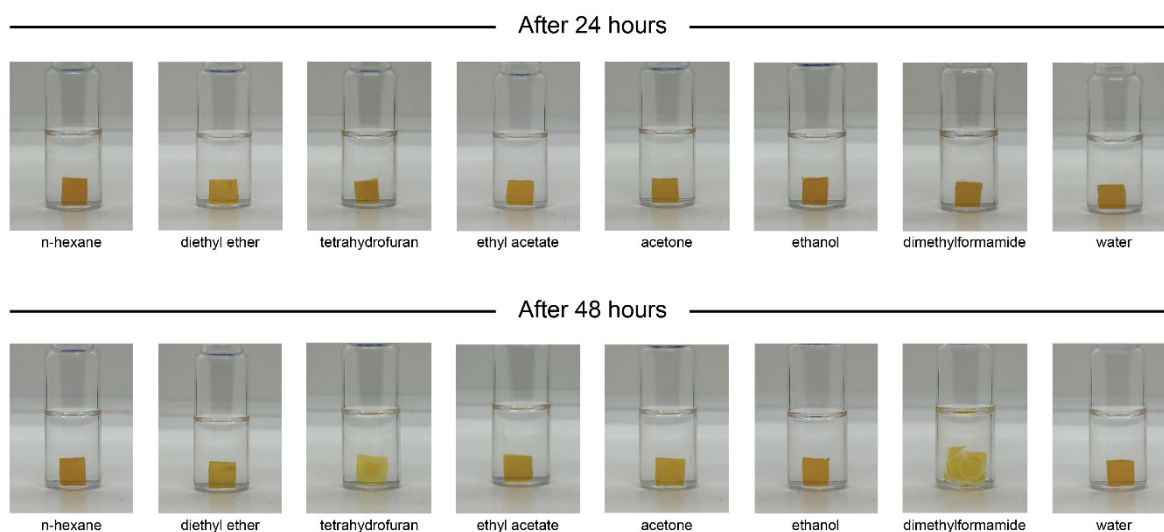

Figure S4. Solvent-immersion tests of **C2PDA**.

Table S1. Swelling ratio and gel fractions of the **C2PDA** network, upon immersion into various organic solvents and water for 2 days at room temperature.

| <b>C2PDA</b>      | <b>Swelling Ratio (%)</b> | <b>Gel Content (%)</b> |
|-------------------|---------------------------|------------------------|
| n-hexane          | 0                         | 100                    |
| Diethyl ether     | 4.7                       | 100                    |
| Tetrahydrofuran   | 159.8                     | 85.8                   |
| Ethyl acetate     | 40.1                      | 97.9                   |
| Acetone           | 51.6                      | 100                    |
| Ethanol           | 44.3                      | 99.7                   |
| Dimethylformamide | 254.2                     | 84.1                   |
| Water             | 15.5                      | 100                    |

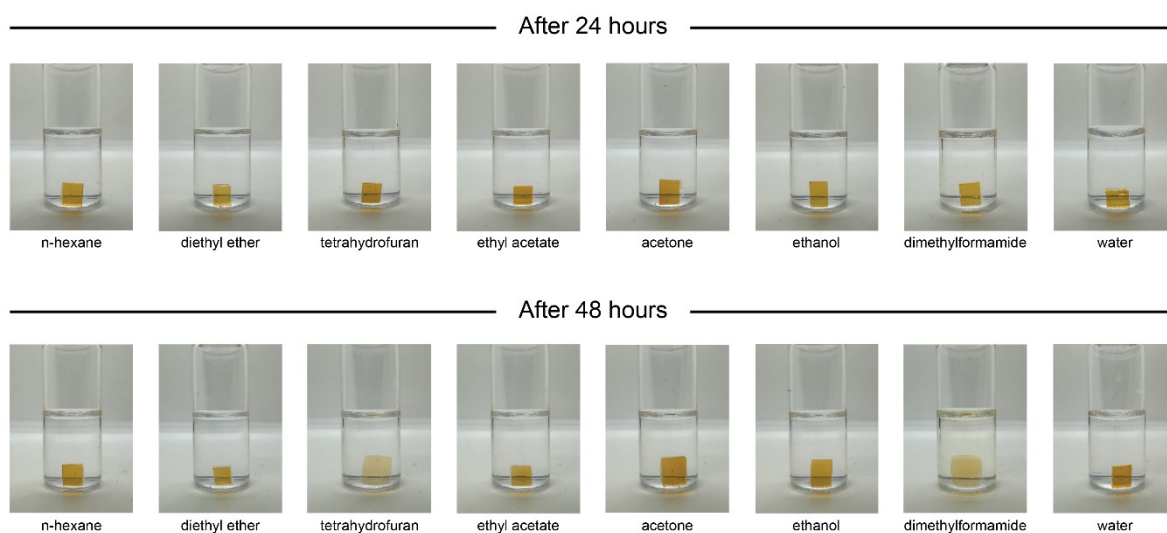

Figure S5. Solvent-immersion tests of **C2FDA**.

Table S2. Swelling ratio and gel fractions of the **C2FDA** network, upon immersion into various organic solvents and water for 2 days at room temperature.

| <b>C2FDA</b>      | <b>Swelling Ratio (%)</b> | <b>Gel Content (%)</b> |
|-------------------|---------------------------|------------------------|
| n-hexane          | 0                         | 99.3                   |
| Diethyl ether     | 0                         | 99.3                   |
| Tetrahydrofuran   | 85.3                      | 100                    |
| Ethyl acetate     | 11.8                      | 100                    |
| Acetone           | 23.1                      | 100                    |
| Ethanol           | 5.6                       | 100                    |
| Dimethylformamide | 151.1                     | 97.2                   |
| Water             | 3.1                       | 98.9                   |

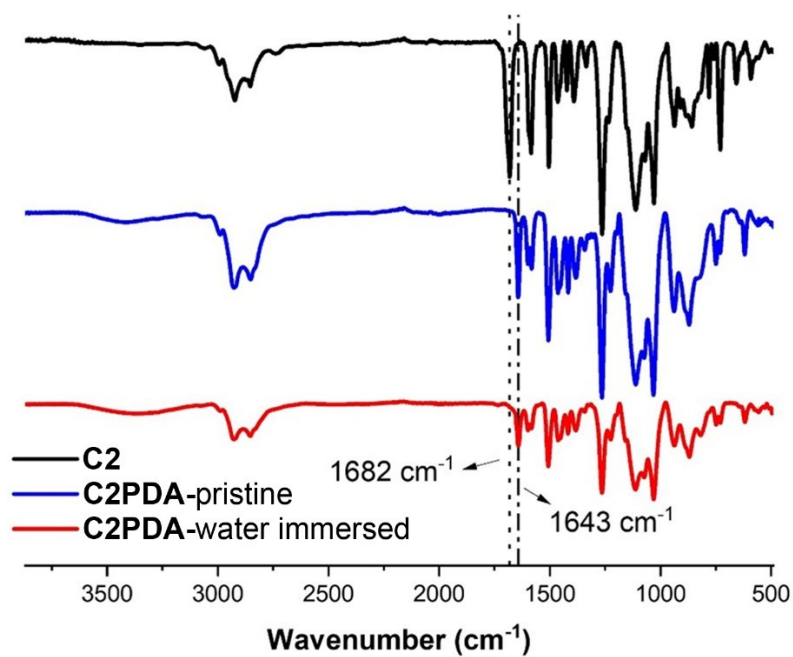

Figure S6. FTIR comparison of **C2** monomer, pristine **C2PDA** network and water immersed **C2PDA** network.

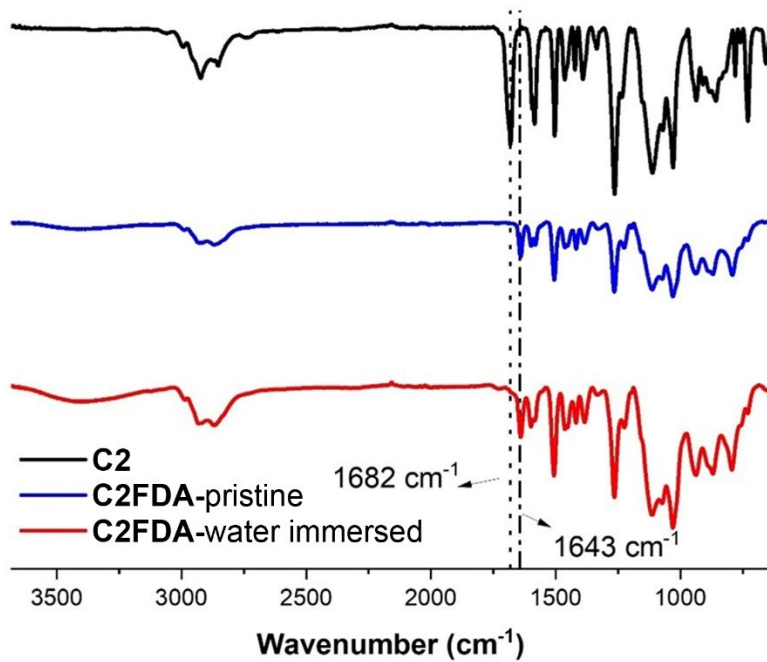

Figure S7. FTIR comparison of **C2** monomer, pristine **C2FDA** network and water immersed **C2FDA** network.



### 3) Dynamic Mechanical Analysis of the Original Networks

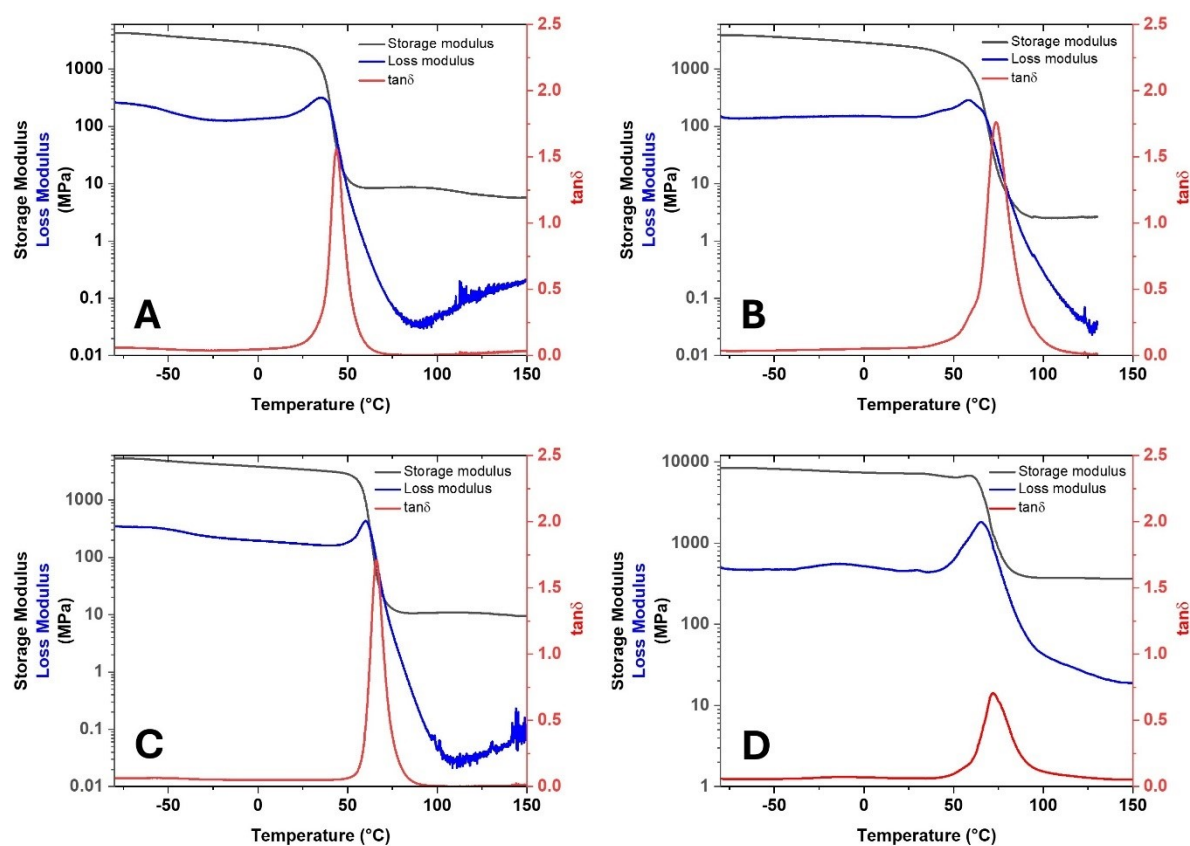

Figure S8. Dynamic mechanical analysis of **C2PDA** (A), **C2MDA** (B), **C2FDA** (C) and **C2FDA-CFC** (D).

#### 4) Mechanical Characterization of the Original Networks and Composite

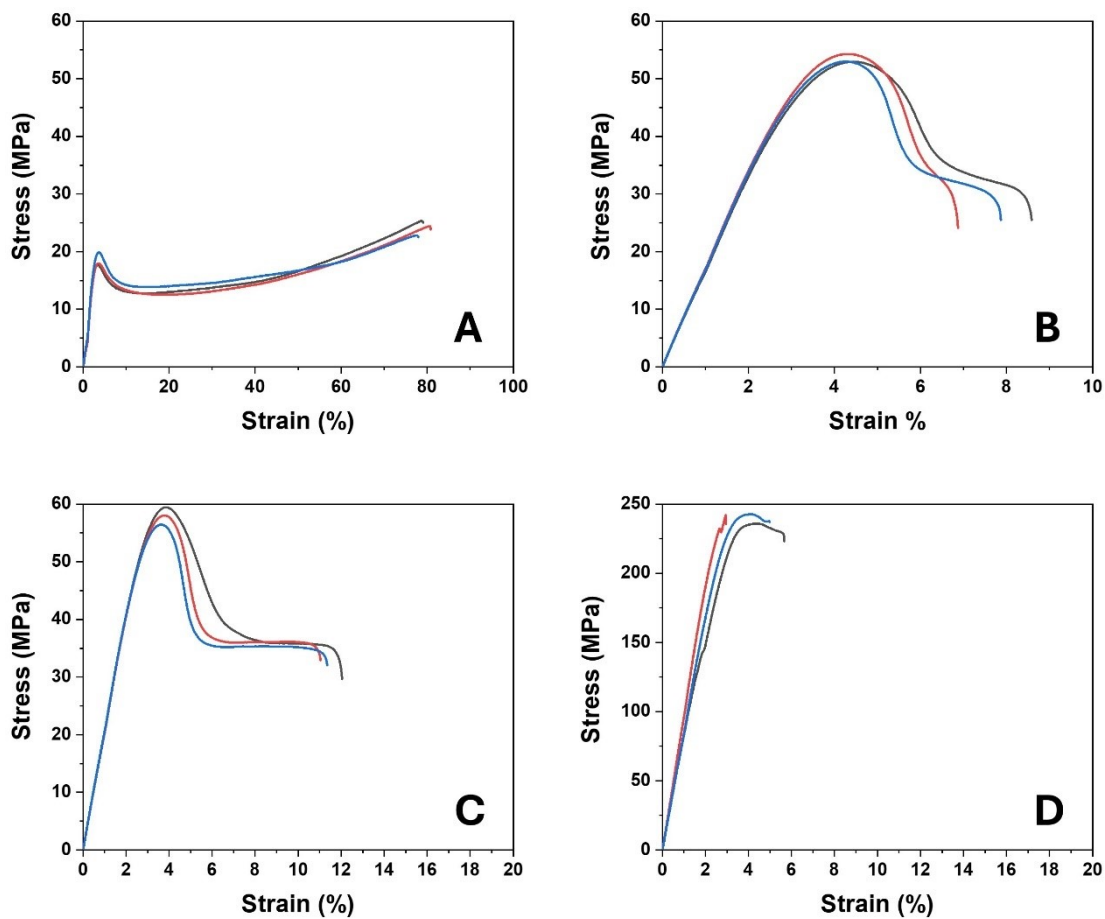

Figure S9. Mechanical characterization of **C2PDA** (A), **C2MDA** (B), **C2FDA** (C), and **C2FDA-CFC** (D).

## 5) Interface Characterization of the Composite through Scanning Electron Microscopy

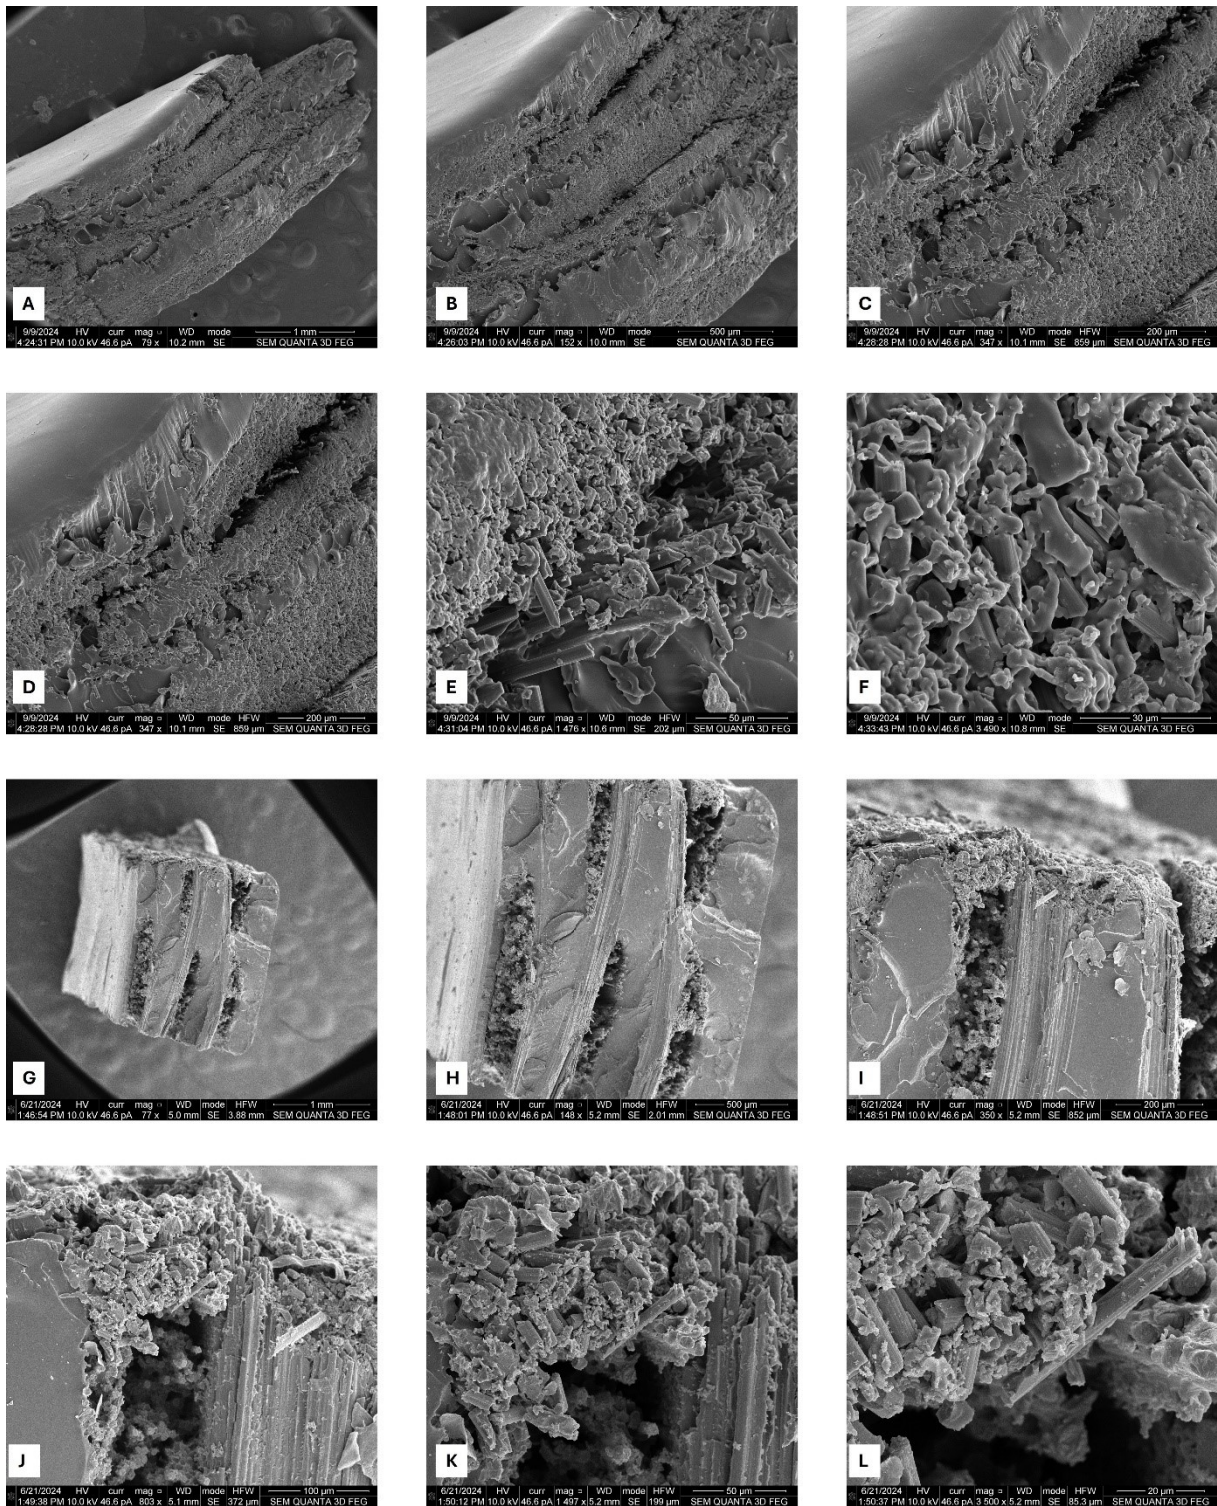

Figure S10. Scanning electron micrographs of the original (A-F) and fractured (G-L) **C2FDA-CFC** at 80X (A, G), 150X (B, H), 350X (C, I), 800X (D, J), 1500X (E, K) and 3500X (F, L) magnifications.

## 6) Structural Characterization of the Acid Depolymerization Products

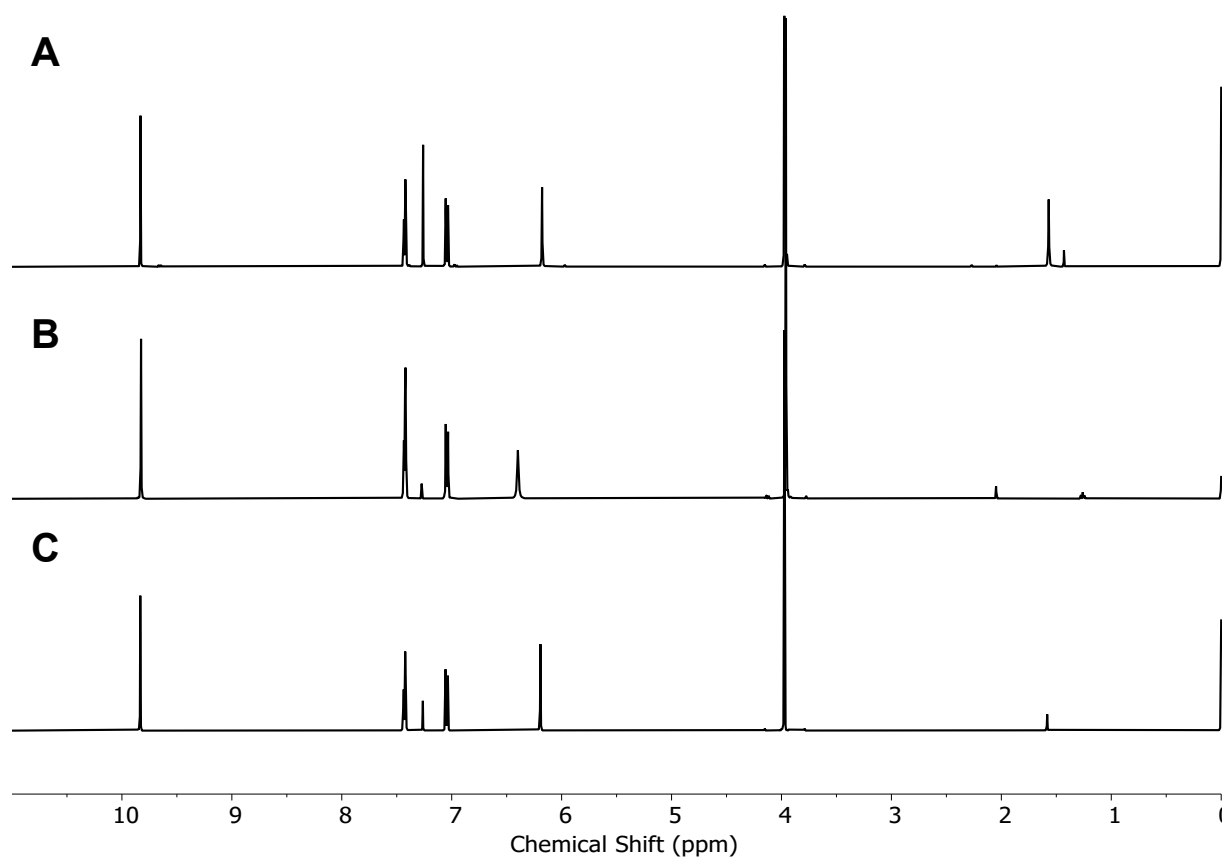

Figure S11.  $^1\text{H}$  NMR spectra of recovered vanillin as depolymerization product: from **C2FDA** (A) and **C2PDA** (B), as compared with original vanillin (C), recorded in  $\text{CDCl}_3$ .

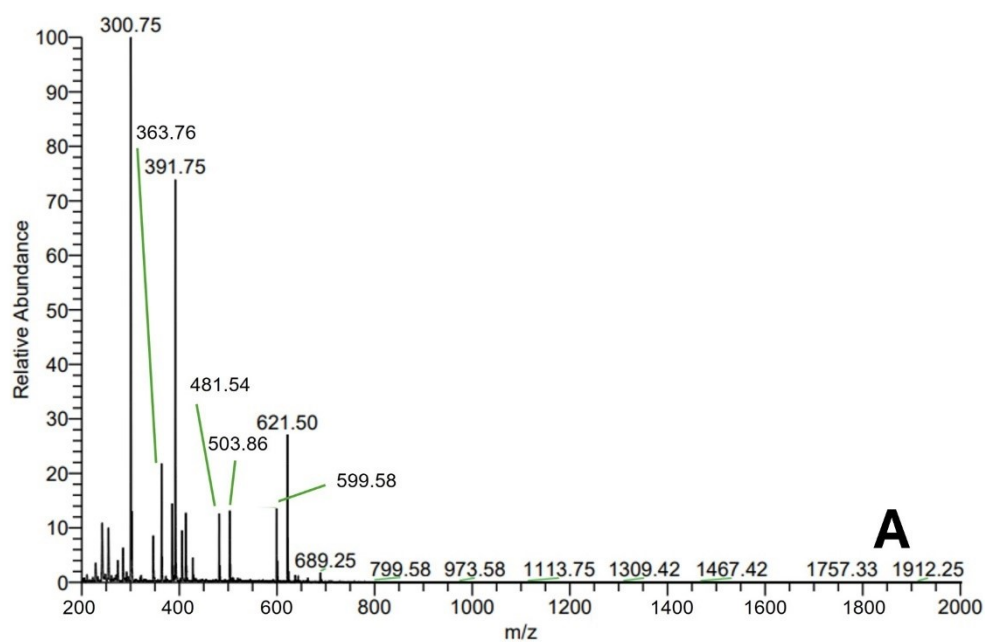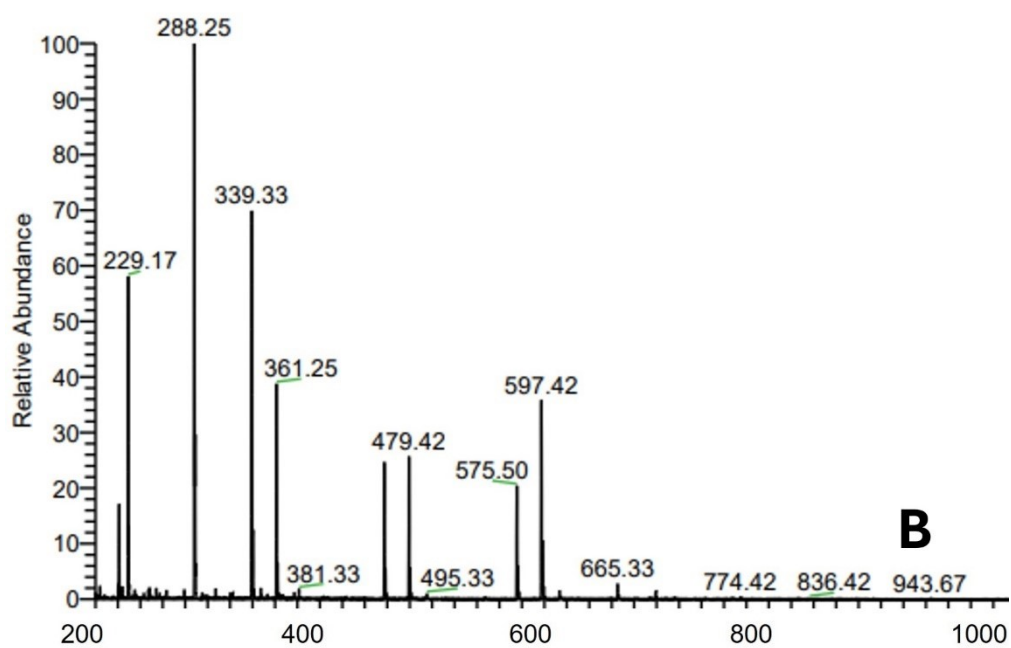

Figure S12. ESI-MS spectra of the polyol mixtures obtained from the acidic depolymerization of **C2FDA** (A) and **C2PDA** (B).

Table S3. Structure elucidation of the corresponding m/z values for the polyol mixtures of **C2FDA** obtained from the acidic depolymerization.

| Structure                                                                                                                                                     | m/z    |
|---------------------------------------------------------------------------------------------------------------------------------------------------------------|--------|
| 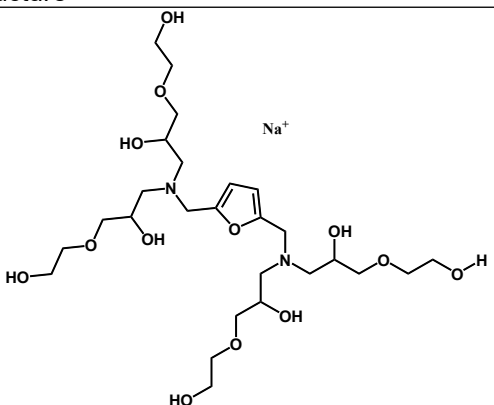 <p>m/z: 621.32 (100.0%), 622.32 (28.1%), 623.33 (3.8%), 623.32 (2.7%)</p>   | 621.50 |
|  <p>m/z: 599.34 (100.0%), 600.34 (28.1%), 601.35 (3.8%), 601.34 (2.7%)</p>  | 599.58 |
|  <p>m/z: 503.26 (100.0%), 504.26 (22.7%), 505.26 (2.5%), 505.26 (2.1%)</p> | 503.86 |
|  <p>m/z: 481.28 (100.0%), 482.28 (22.7%), 483.28 (2.5%), 483.28 (2.1%)</p> | 481.54 |

|                                                                                                                                                                             |        |
|-----------------------------------------------------------------------------------------------------------------------------------------------------------------------------|--------|
| 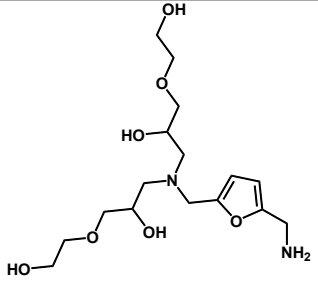 <p>m/z: 402.24 (100.0%), 403.24 (20.5%), 404.24 (2.0%), 404.24 (1.4%)</p>                 | 385.41 |
|  <p>m/z: 363.21 (100.0%), 364.22 (17.3%), 365.22 (1.4%), 365.22 (1.4%)</p>                 | 363.76 |
|  <p>m/z: 300.17 (100.0%), 300.67 (28.1%), 301.18 (2.7%), 301.18 (2.7%), 301.18 (1.1%)</p> | 300.75 |
|  <p>m/z: 241.14 (100.0%), 241.64 (22.7%), 242.14 (2.5%), 242.14 (2.1%)</p>               | 240.94 |

Table S4. Structure elucidation of the corresponding m/z values for the polyol mixtures of **C2PDA** obtained from the acidic depolymerization.

| Structure                                                                                                                                                     | m/z    |
|---------------------------------------------------------------------------------------------------------------------------------------------------------------|--------|
| 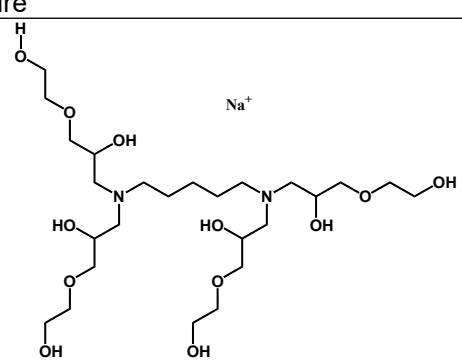 <p>m/z: 597.36 (100.0%), 598.36 (27.0%), 599.36 (3.5%), 599.36 (2.5%)</p>   | 597.42 |
|  <p>m/z: 575.37 (100.0%), 576.38 (27.0%), 577.38 (3.5%), 577.38 (1.6%)</p>  | 575.50 |
|  <p>m/z: 479.29 (100.0%), 480.30 (21.6%), 481.30 (2.2%), 481.30 (1.8%)</p> | 479.42 |
|  <p>m/z: 457.31 (100.0%), 458.32 (21.6%), 459.32 (2.2%), 459.32 (1.8%)</p> | 457.31 |
|  <p>m/z: 361.23 (100.0%), 362.23 (16.2%), 363.24 (1.2%), 363.24 (1.2%)</p> | 361.25 |
|  <p>m/z: 339.25 (100.0%), 340.25 (16.2%), 341.25 (1.2%), 341.26 (1.2%)</p> | 339.33 |



|                                                                                                                                                             |        |
|-------------------------------------------------------------------------------------------------------------------------------------------------------------|--------|
| 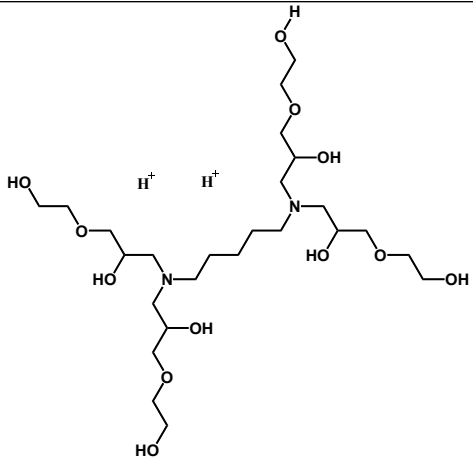 <p>m/z: 288.19 (100.0%), 288.69 (27.0%), 289.19 (2.7%), 289.19 (2.5%)</p> | 288.25 |
|  <p>m/z: 229.16 (100.0%), 229.66 (21.6%), 230.16 (2.2%), 230.16 (1.8%)</p> | 229.17 |

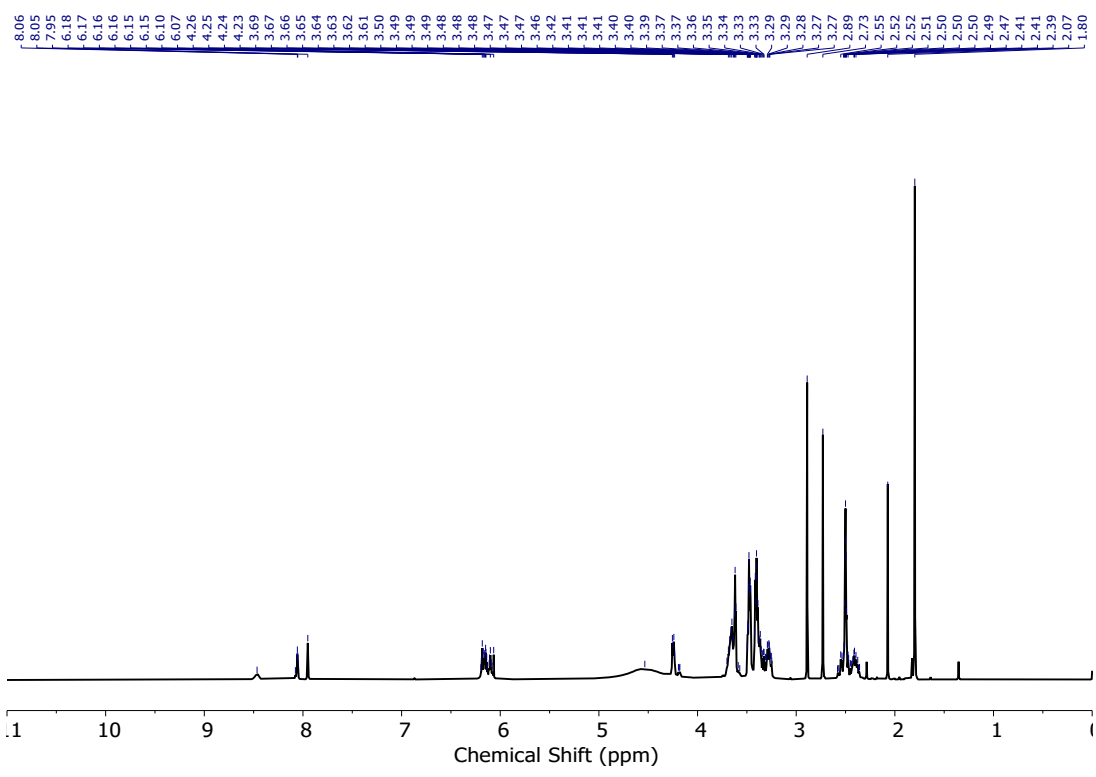

Figure S13. <sup>1</sup>H NMR spectra of recovered polyol mixture of **C2FDA** as depolymerization product, recorded in DMSO-d<sub>6</sub>.

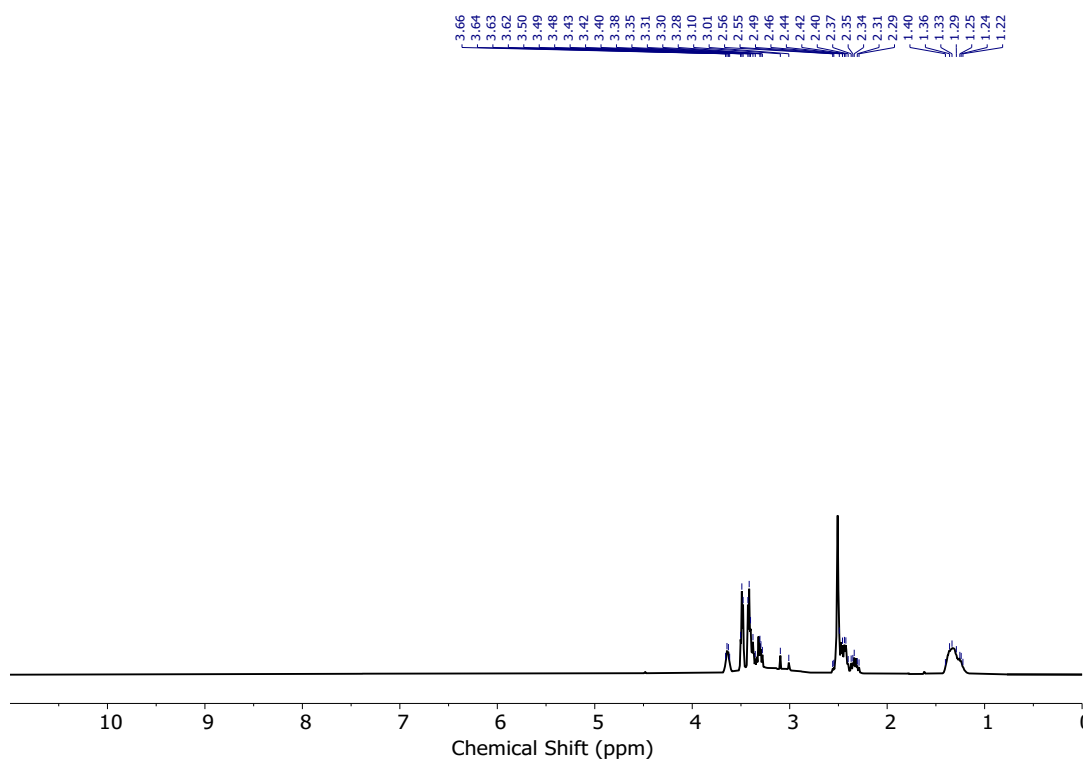

Figure S14.  $^1\text{H}$  NMR spectra of recovered polyol mixture of **C2PDA** as depolymerization product, recorded in  $\text{DMSO-d}_6$ .

## 7) Recycling of Carbon Fibers from the C2FDA-CFC

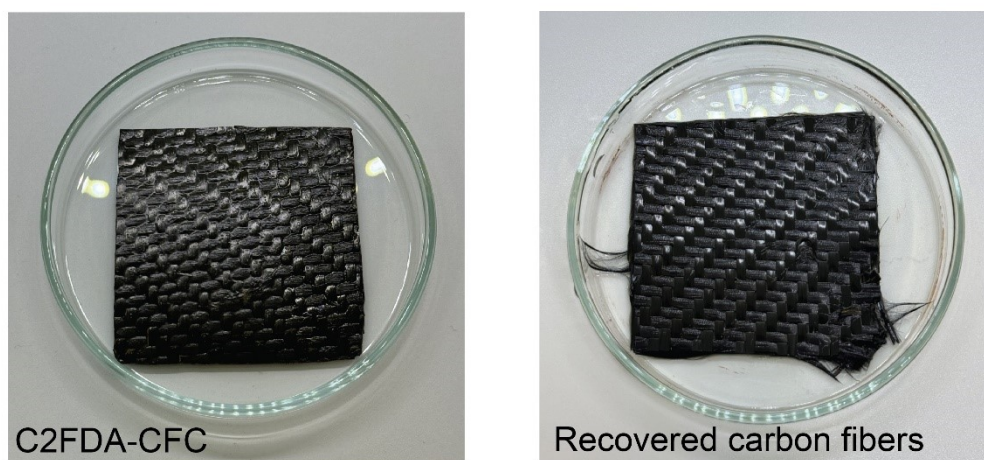

Figure S15. Images of **C2FDA-CFC** and recovered carbon fiber cloth from the acidic depolymerization pathway.

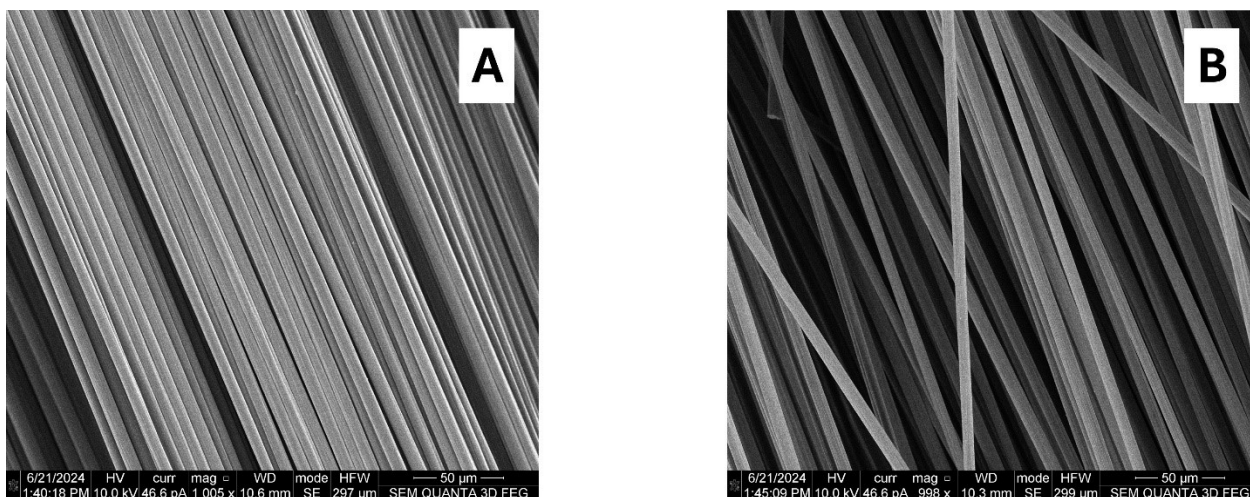

Figure S16. Scanning electron micrographs of virgin (A) and recovered carbon fibers (B) from the acidic depolymerization of **C2FDA-CFC** (scale bar is 50 μm).

## 8) Thermal Characterization of Recycled Networks

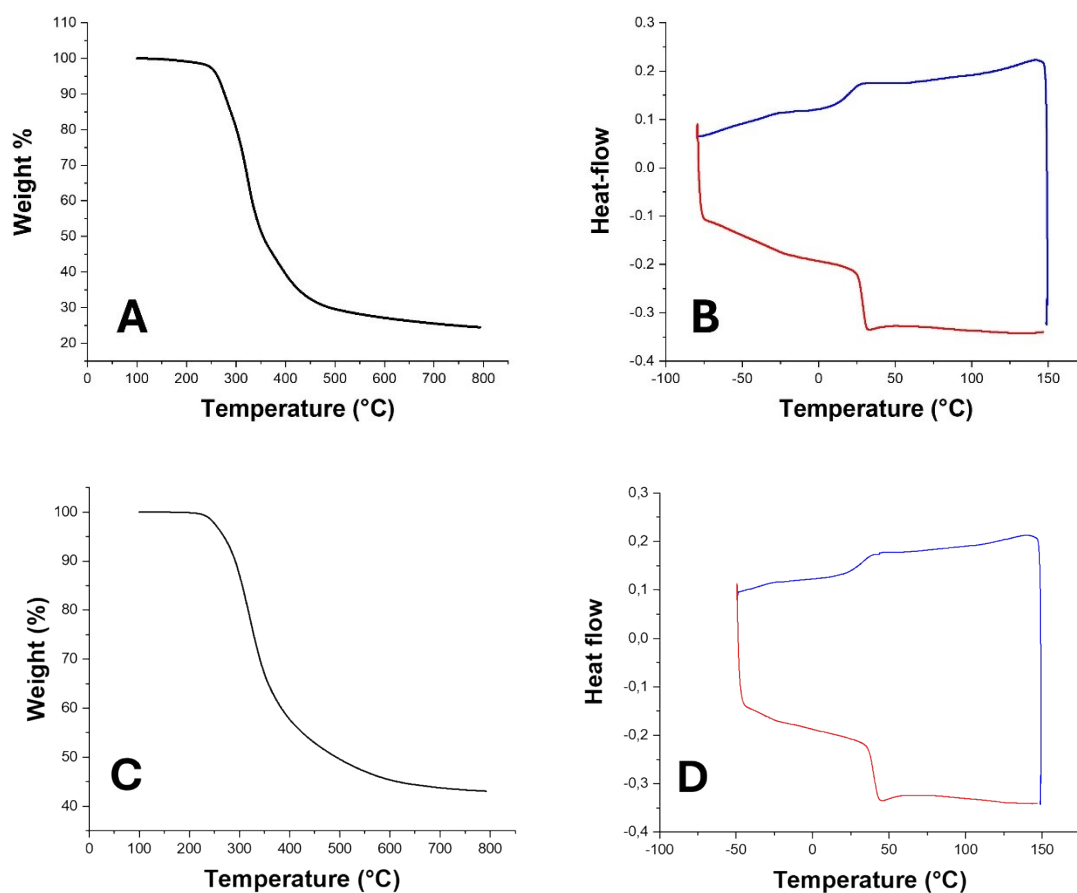

Figure S17. TGA (A, C) and DSC (B, D) thermographs of recycled networks: **rC2PDA** (A, B) and **rC2FDA** (C, D).

## 9) Thermomechanical and Mechanical Characterization of Recycled Networks

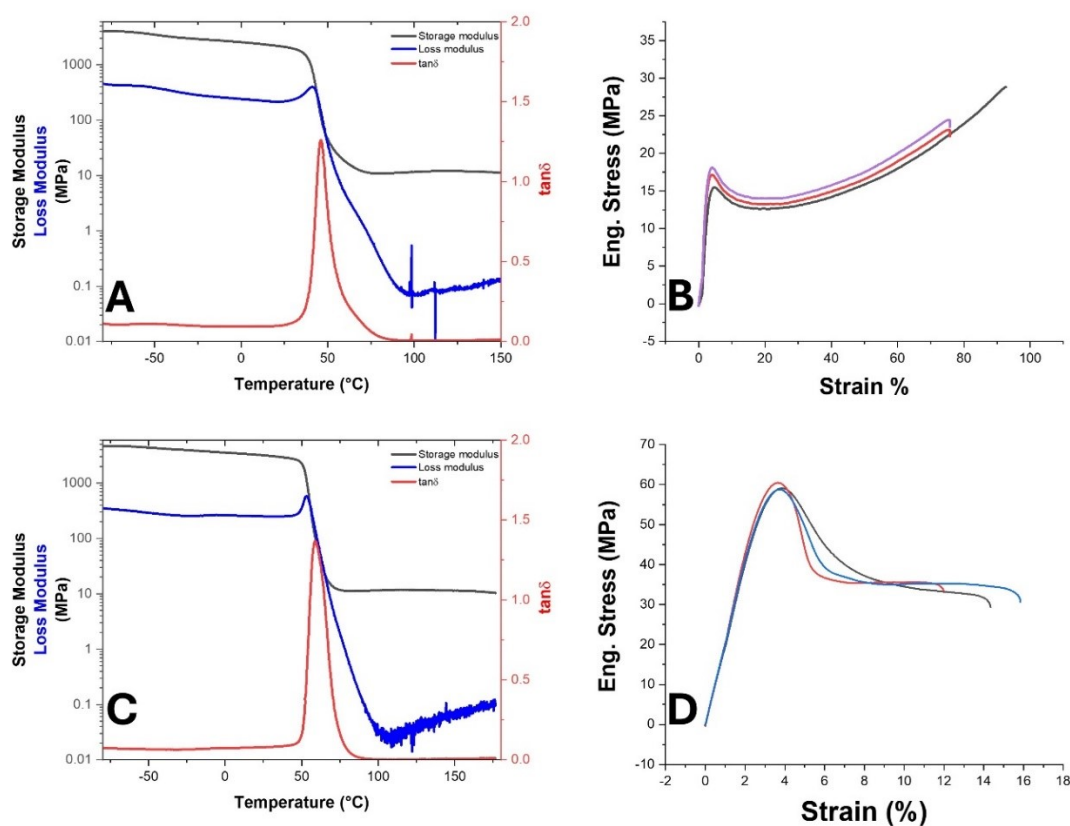

Figure S18. DMA (A, C) and stress-strain (B, D) plots of recycled networks: rC2PDA (A, B) and rC2FDA (C, D).

## 10) Thermomechanical and Mechanical Characterization of Reprogrammed C2PDAFDA Network

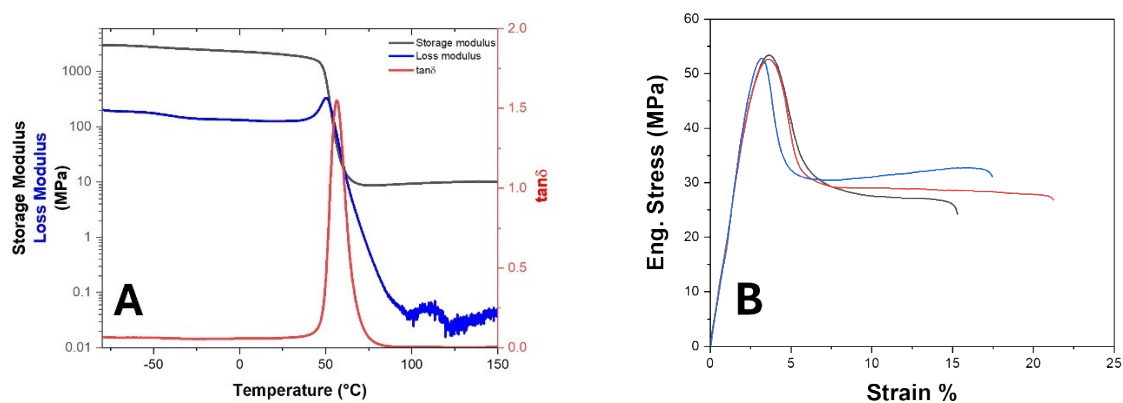

Figure S19. DMA (A) and stress-strain (B) plots of reprogrammed C2PDAFDA networks.

## 11) Extended Data

Table S5. Extended data for thermomechanical characteristics of original, recycled and reprogrammed networks.

| <b>Networks</b>  | $T_g^a$ (°C) | $T_g^b$ (°C) | $T_g^c$ (°C) | $E_{30}'$ (MPa) | $E_{100}'$ (MPa) |
|------------------|--------------|--------------|--------------|-----------------|------------------|
| <b>C2PDA</b>     | 34.7         | 35.0         | 43.9         | 1684.3          | 8.2              |
| <b>C2MDA</b>     | 62.6         | 58.2         | 73.6         | 2369.5          | 2.5              |
| <b>C2FDA</b>     | 57.8         | 60.0         | 66.2         | 3355.1          | 10.8             |
| <b>C2FDA-CFC</b> | 63.2         | 65.2         | 71.9         | 7206.0          | 373.3            |
| <b>rC2PDA</b>    | 38.9         | 41.3         | 46.1         | 1958.0          | 11.6             |
| <b>rC2FDA</b>    | 50.3         | 53.2         | 59.0         | 3087.3          | 11.6             |
| <b>C2PDAFDA</b>  | 47.8         | 50.0         | 56.6         | 1970.3          | 9.4              |

\* $T_g^a$ : glass-transition temperature identified by the intercept between two tangential lines—one from the glassy plateau of the storage modulus and the other from the sharp decline in the transition region.  $T_g^b$ : glass-transition temperature identified by the maxima of the loss modulus curves,  $T_g^c$ : glass-transition temperature identified by the maxima of the  $\tan\delta$  curves.
